# Supplementary material for: Preparation and Evaluation of Auxiliary Permeable Microneedle Patch Composed of Polyvinyl Alcohol and Eudragit NM30D Aqueous Dispersion
Source: MDPI journal article supplement (doi:10.3390/pharmaceutics15072007), 2023-07-22
Supplement: s1 [file s1]

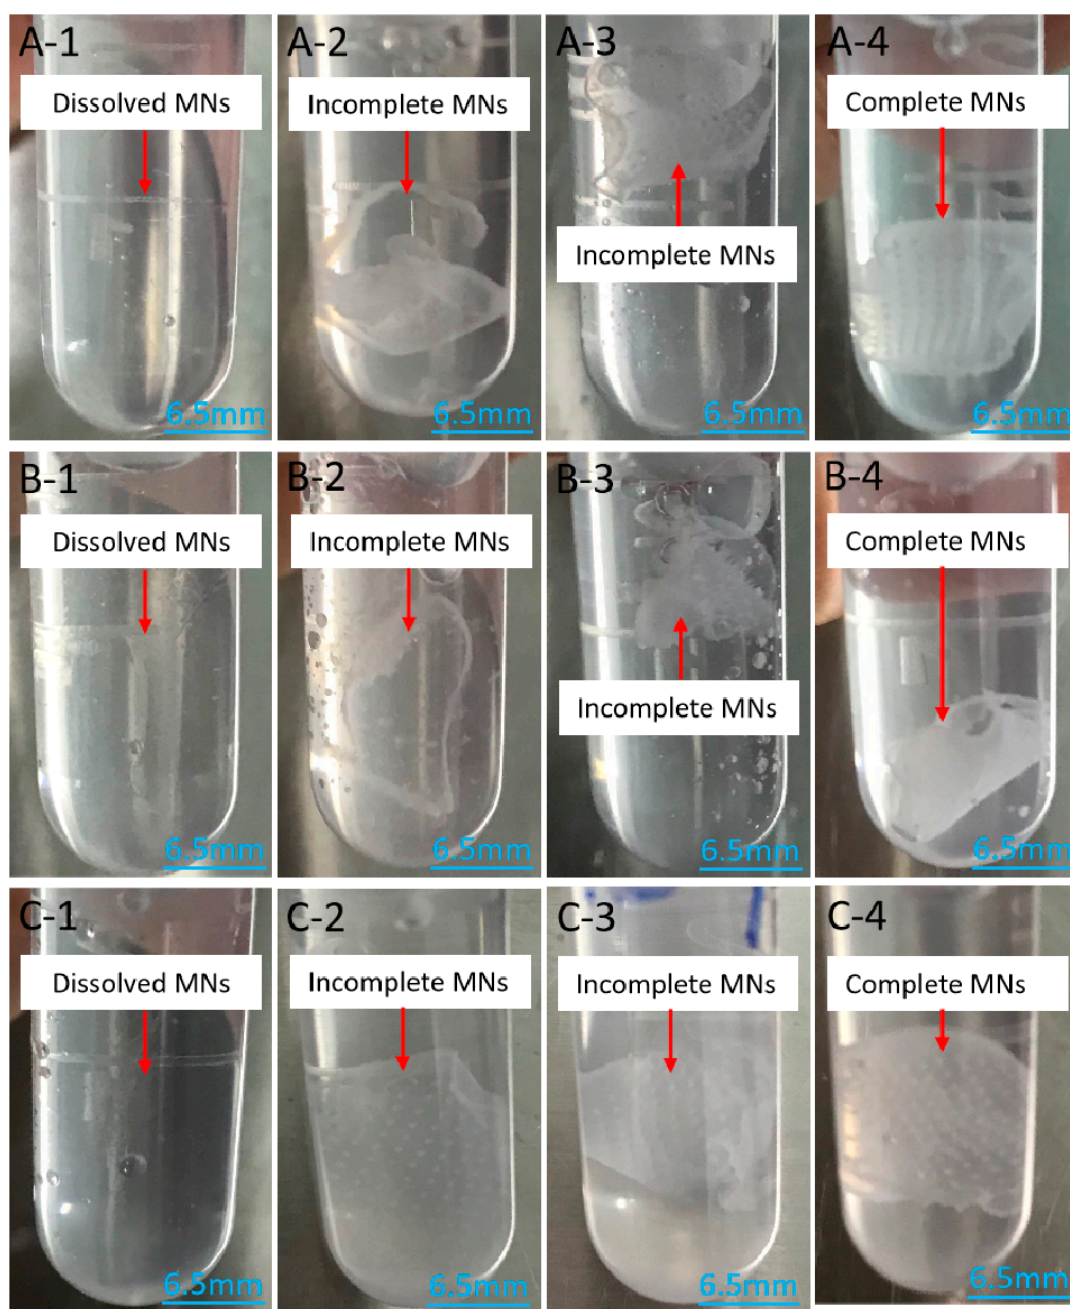

**Figure S1:** (A) Morphological integrity of microneedles after swelling prepared with 10% PVA + 0% Eudragit NM30D (A-1), 10% PVA + 2% Eudragit NM30D (A-2), 10% PVA + 3% Eudragit NM30D (A-3), and 10% PVA + 4% Eudragit NM30D (A-4), respectively; (B) Morphological integrity of microneedles after swelling prepared with 12% PVA + 0% Eudragit NM30D (B-1), 12% PVA + 2% Eudragit NM30D (B-2), 12% PVA + 3% Eudragit NM30D (B-3), and 12% PVA + 4% Eudragit NM30D (B-4), respectively; (C) Morphological integrity of microneedles after swelling prepared with 15% PVA + 0% Eudragit NM30D (C-1), 15% PVA + 2% Eudragit NM30D (C-2), 15% PVA + 3% Eudragit NM30D (C-3), and 15% PVA + 4% Eudragit NM30D (C-4), respectively

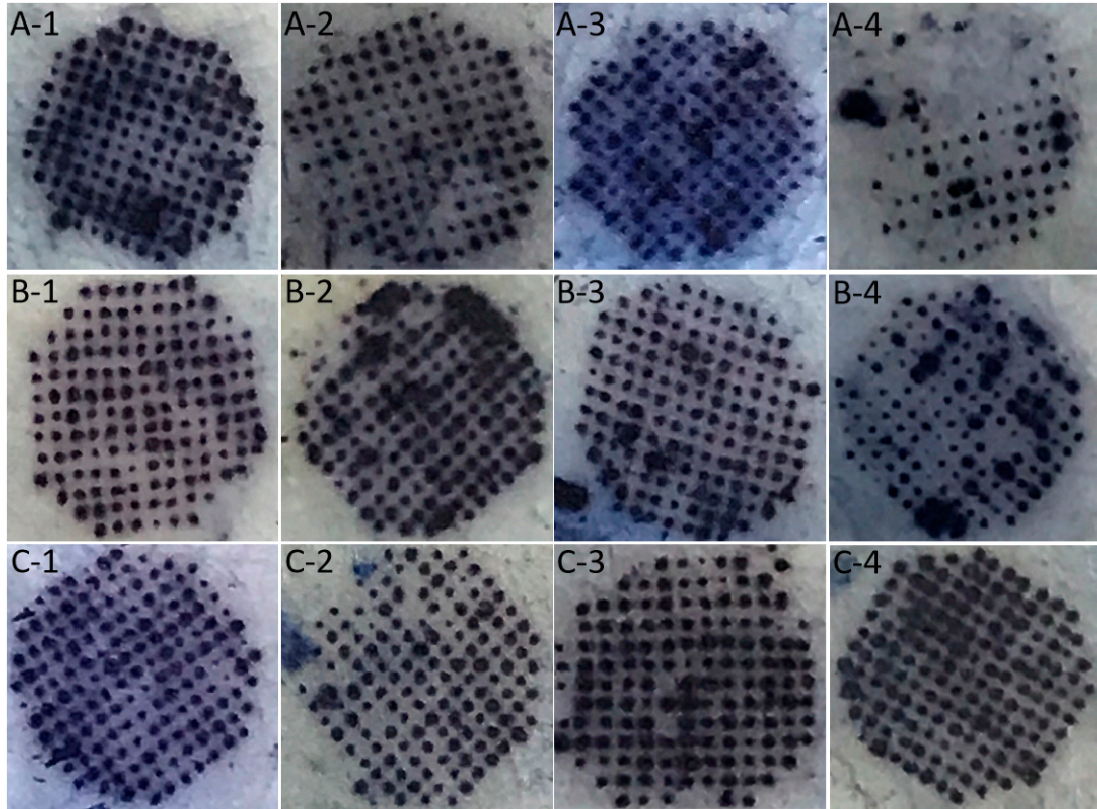

**Figure S2:** Skin insertion arrays of microneedles prepared with 10% PVA and different proportions of Eudragit NM30D (A-1 to A-4 were 0, 2, 3, 4% Eudragit NM30D, respectively); **(B)** Morphological integrity of microneedles prepared with 12% PVA and different proportions of Eudragit NM30D (B-1 to B-4 were 0, 2, 3, 4% Eudragit NM30D, respectively); **(C)** Morphological integrity of microneedles prepared with 15% PVA and different proportions of Eudragit NM30D (C-1 to C-4 were 0, 2, 3, 4% Eudragit NM30D, respectively).

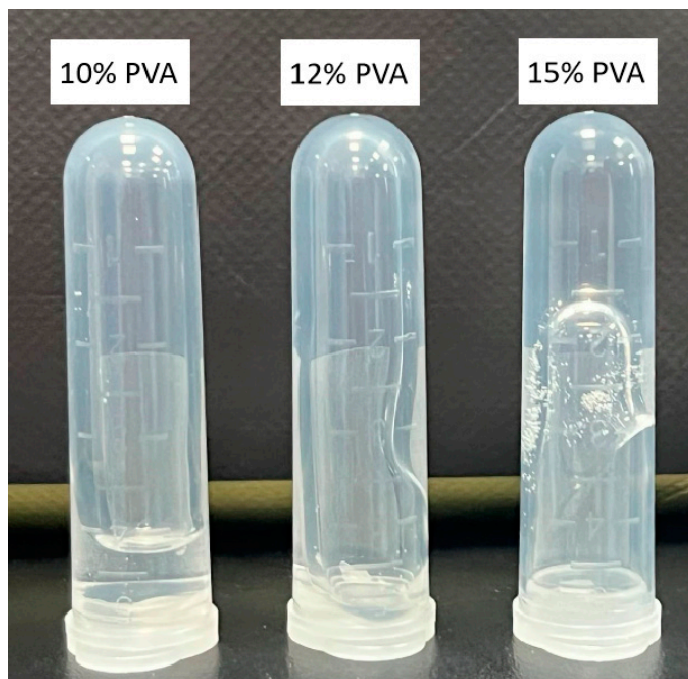

**Figure S3:** The physical images of PVA solution of 10%, 12% and 15%, respectively.

**Table S1.** Formulation of MNs composed of PVA and Eudragit NM30D.

| <b>Formulation code</b> | <b>PVA (%<i>, w/v</i>)</b> | <b>Eudragit NM30D (%<i>, w/v</i>)</b> |
|-------------------------|----------------------------|---------------------------------------|
| H1                      | 10                         | 0                                     |
| H2                      | 10                         | 2                                     |
| H3                      | 10                         | 3                                     |
| H4                      | 10                         | 4                                     |
| H5                      | 12                         | 0                                     |
| H6                      | 12                         | 2                                     |
| H7                      | 12                         | 3                                     |
| H8                      | 12                         | 4                                     |
| H9                      | 15                         | 0                                     |
| H10                     | 15                         | 2                                     |
| H11                     | 15                         | 3                                     |
| H12                     | 15                         | 4                                     |
